## Correction

# Correction: *Lilium* spp. pollen in China (Liliaceae): Taxonomic and Phylogenetic Implications and Pollen Evolution Related to Environmental Conditions

The PLOS ONE Staff

Affiliation number 1 for all authors is incorrect.

The correct affiliation is:

Beijing Key Laboratory of Ornamental Plants Germplasm Innovation & Molecular Breeding, National Engineering Research Center for Floriculture and College of Landscape Architecture, Beijing Forestry University, Beijing, China.

## Reference

1. Du Y-p, Wei C, Wang Z-x, Li S, He H-b, et al. (2014) *Lilium* spp. pollen in China (Liliaceae): Taxonomic and Phylogenetic Implications and Pollen Evolution Related to Environmental Conditions. PLoS ONE 9(1): e87841. doi:10.1371/journal.pone.0087841

**Citation:** The PLOS ONE Staff (2014) Correction: *Lilium* spp. pollen in China (Liliaceae): Taxonomic and Phylogenetic Implications and Pollen Evolution Related to Environmental Conditions. PLoS ONE 9(3): e91543. doi:10.1371/journal.pone.0091543

**Published:** March 7, 2014

**Copyright:** © 2014 The PLOS ONE Staff. This is an open-access article distributed under the terms of the Creative Commons Attribution License, which permits unrestricted use, distribution, and reproduction in any medium, provided the original author and source are credited.
